# Supplementary material
Source: publisher figshare collection journal article supplement (https://rs.figshare.com/ndownloader/files/14049200)
Supplement: Supplementary file 1 [file 14049200]

## Sheet: Test1
Test1A: D((Iberian_1, Iberian_2) African, Chimp)*
D(Iberian_Neo, La Braña; Ballito Bay A_2000 yBP, Chimp)										D(Iberian_Neo, La Braña; I9028_2000 yBP, Chimp)										D(Iberian_Neo, La Braña; I9133_2000 yBP, Chimp)										D(Iberian_Neo, La Braña; Newcastle_IA, Chimp)										D(Iberian_Neo, La Braña; Mfongosi_IA, Chimp)
H1	H2	H3	nABBA	nBABA	Dstat	jackEst	SE	Z		H1	H2	H3	nABBA	nBABA	Dstat	jackEst	SE	Z		H1	H2	H3	nABBA	nBABA	Dstat	jackEst	SE	Z		H1	H2	H3	nABBA	nBABA	Dstat	jackEst	SE	Z		H1	H2	H3	nABBA	nBABA	Dstat	jackEst	SE	Z
atp019_EN_North	LaBrana	Ballito	45099	45679	-0.00638921	-0.00638921	0.00503885	-1.26799		atp019_EN_North	LaBrana	I9028	35146	36178	-0.0144692	-0.0144692	0.0050503	-2.86501		atp019_EN_North	LaBrana	I9133	36664	37490	-0.011139	-0.011139	0.00500174	-2.22702		atp019_EN_North	LaBrana	Newcastle-SE_sort_dedup30_rg_realigned.bam	50816	51545	-0.00712185	-0.00712185	0.00498409	-1.42892		atp019_EN_North	LaBrana	Mfongosi	50172	51954	-0.017449	-0.017449	0.00485431	-3.59454
mur_EN_South	LaBrana	Ballito	45575	46801	-0.0132718	-0.0132718	0.00501786	-2.64492		mur_EN_South	LaBrana	I9028	35836	36852	-0.0139776	-0.0139776	0.00522639	-2.67442		mur_EN_South	LaBrana	I9133	36997	38366	-0.0181654	-0.0181654	0.00523638	-3.46908		mur_EN_South	LaBrana	Newcastle-SE_sort_dedup30_rg_realigned.bam	51747	52429	-0.00654661	-0.00654661	0.00528342	-1.23909		mur_EN_South	LaBrana	Mfongosi	50919	52999	-0.0200158	-0.0200158	0.00493709	-4.05417
ATP2_MN_North	LaBrana	Ballito	44807	46733	-0.02104	-0.02104	0.00499644	-4.21099		ATP2_MN_North	LaBrana	I9028	35288	37240	-0.0269137	-0.0269137	0.00491307	-5.47799		ATP2_MN_North	LaBrana	I9133	36790	38661	-0.0247976	-0.0247976	0.00500165	-4.95788		ATP2_MN_North	LaBrana	Newcastle-SE_sort_dedup30_rg_realigned.bam	50594	52605	-0.0194866	-0.0194866	0.0051058	-3.81657		ATP2_MN_North	LaBrana	Mfongosi	50152	52635	-0.0241568	-0.0241568	0.00489194	-4.93808
atp12-1420_MN_North	LaBrana	Ballito	43268	44604	-0.0152039	-0.0152039	0.0051412	-2.95727		atp12-1420_MN_North	LaBrana	I9028	34141	35353	-0.0174404	-0.0174404	0.00504964	-3.45378		atp12-1420_MN_North	LaBrana	I9133	35429	36788	-0.0188183	-0.0188183	0.00517886	-3.63367		atp12-1420_MN_North	LaBrana	Newcastle-SE_sort_dedup30_rg_realigned.bam	49167	50316	-0.0115497	-0.0115497	0.00498375	-2.31747		atp12-1420_MN_North	LaBrana	Mfongosi	48693	50519	-0.018405	-0.018405	0.00512004	-3.59471
LU339_MN_South	LaBrana	Ballito	46272	47883	-0.0171101	-0.0171101	0.00489244	-3.49725		LU339_MN_South	LaBrana	I9028	36688	38055	-0.0182893	-0.0182893	0.00516215	-3.54297		LU339_MN_South	LaBrana	I9133	37975	39489	-0.0195446	-0.0195446	0.0050316	-3.88436		LU339_MN_South	LaBrana	Newcastle-SE_sort_dedup30_rg_realigned.bam	52118	54104	-0.0186967	-0.0186967	0.00532251	-3.51276		LU339_MN_South	LaBrana	Mfongosi	51413	54674	-0.0307389	-0.0307389	0.00492597	-6.24017
LD270_MN_NorthW	LaBrana	Ballito	43686	44285	-0.00680906	-0.00680906	0.00534686	-1.27347		LD270_MN_NorthW	LaBrana	I9028	33667	34281	-0.00903632	-0.00903632	0.00527515	-1.713		LD270_MN_NorthW	LaBrana	I9133	35371	35857	-0.00682316	-0.00682316	0.00543482	-1.25545		LD270_MN_NorthW	LaBrana	Newcastle-SE_sort_dedup30_rg_realigned.bam	49292	50126	-0.00838882	-0.00838882	0.00516137	-1.62531		LD270_MN_NorthW	LaBrana	Mfongosi	49010	49759	-0.00758335	-0.00758335	0.00518611	-1.46224
LD1174_MN_NorthW	LaBrana	Ballito	45791	47062	-0.0136883	-0.0136883	0.00511315	-2.67708		LD1174_MN_NorthW	LaBrana	I9028	35636	36778	-0.0157704	-0.0157704	0.0050481	-3.12403		LD1174_MN_NorthW	LaBrana	I9133	37069	37962	-0.0119017	-0.0119017	0.00540185	-2.20327		LD1174_MN_NorthW	LaBrana	Newcastle-SE_sort_dedup30_rg_realigned.bam	52013	52984	-0.00924788	-0.00924788	0.00493008	-1.87581		LD1174_MN_NorthW	LaBrana	Mfongosi	51028	53215	-0.0209798	-0.0209798	0.00493715	-4.24938
esp005_BA_North	LaBrana	Ballito	41912	43787	-0.0218789	-0.0218789	0.00527835	-4.14502		esp005_North	LaBrana	I9028	33345	34934	-0.0232722	-0.0232722	0.00514322	-4.52483		esp005_North	LaBrana	I9133	34447	36139	-0.0239708	-0.0239708	0.005221	-4.59122		esp005_North	LaBrana	Newcastle-SE_sort_dedup30_rg_realigned.bam	47160	49491	-0.0241177	-0.0241177	0.00499287	-4.83043		esp005_North	LaBrana	Mfongosi	46730	49353	-0.0272993	-0.0272993	0.00499152	-5.46913
COV20126_BA_South	LaBrana	Ballito	12986	12399	0.0231239	0.0231239	0.00748167	3.09074		COV20126_South	LaBrana	I9028	9670	9379	0.0152764	0.0152764	0.0083075	1.83887		COV20126_South	LaBrana	I9133	9985	9758	0.0114977	0.0114977	0.00842844	1.36416		COV20126_South	LaBrana	Newcastle-SE_sort_dedup30_rg_realigned.bam	14518	13922	0.0209564	0.0209564	0.00712856	2.93978		COV20126_South	LaBrana	Mfongosi	14300	14007	0.0103508	0.0103508	0.00763126	1.35637
*Significant and negative values of the test are highlighted in bold characters
The African Ballito is closer to the Middle Neolithic Spanish than to La Brana
Test1B: D((WHG, LaBrana) African, Chimp)
		Comparision (Ballito (OA, LaBrana_WHG))
H1	H2	H3	nABBA	nBABA	Dstat	jackEst	SE	Z
Chan	LaBrana	Ballito	39482	39343	0.0017634	0.0017634	0.00555169	0.317633
Canes	LaBrana	Ballito	31027	31736	-0.0112965	-0.0112965	0.00554114	-2.03865
LaBrana	Bichon	Ballito	44201	44949	-0.00839035	-0.00839035	0.00514239	-1.6316
LaBrana	Loschbour	Ballito	44675	45840	-0.0128708	-0.0128708	0.00530141	-2.42781
LaBrana	OC	Ballito	38728	38144	0.00759704	0.00759704	0.00529633	1.4344
LaBrana	SC1_Meso	Ballito	30000	29688	0.00522718	0.00522718	0.00590211	0.885646
LaBrana	SC2_Meso	Ballito	42357	42093	0.00312611	0.00312611	0.00546581	0.571939
LaBrana	Motala12	Ballito	41837	41324	0.00616876	0.00616876	0.00513438	1.20146
The WHG form a clade between them to the exclusion of the African Ballito
Test1C: D((WHG, LaBrana) African, Chimp)
		Comparision (Ballito (OA, LaBrana))
H1	H2	H3	nABBA	nBABA	Dstat	jackEst	SE	Z
LaBrana	Ballynahatty	Ballito	50575	51836	-0.0123131	-0.0123131	0.00485083	-2.53835
LaBrana	Rathlin1	Ballito	50912	52050	-0.0110526	-0.0110526	0.00490087	-2.25524
LaBrana	BR2	Ballito	50526	49915	0.00608317	0.00608317	0.004906	1.23995
LaBrana	NE1	Ballito	51228	50979	0.00243623	0.00243623	0.00499724	0.487516
LaBrana	Sttutgart	Ballito	52049	51671	0.00364443	0.00364443	0.00508958	0.716056
LaBrana	GB_Eneo	Ballito	46667	46157	0.00549427	0.00549427	0.00519193	1.05823
LaBrana	RISE479	Ballito	35345	34490	0.0122431	0.0122431	0.00527888	2.31927
LaBrana	ZVEJ31	Ballito	31027	30555	0.00766458	0.00766458	0.00568291	1.34871
European Neolithic and postNeolithic samples form clades with LaBrana to the exclusion of the African Ballito
[truncated: 9 more columns]

## Sheet: Test2
Test4: D((Romanian_WHG, Romanian/Hungarian_postMeso) African, Chimp)*
H1	H2	H3	nABBA	nBABA	Dstat	jackEst	SE	Z
The Romanian WHG form clusters with the postMesolthic individuals from Romania
and Hungary to the exclusion of the Africans
Romanian_WHG_OC	Hungarian_EN_NE1	Ballito Bay A	59377	59926	-0.00460173	-0.00460173	0.00478569	-0.96156
Romanian_WHG_OC	Romanian_Eneo_GB	Ballito Bay A	54428	54626	-0.00181561	-0.00181561	0.00482187	-0.376537
Romanian_WHG_OC	Hungarian_BA_BR2	Ballito Bay A	58371	58351	0.000171347	0.000171347	0.00470795	0.0363953
Romanian_WHG_M95	Hungarian_EN_NE1	Ballito Bay A	47058	47172	-0.00120981	-0.00120981	0.0052376	-0.230985
Romanian_WHG_M95	Romanian_Eneo_GB	Ballito Bay A	42945	42918	0.000314454	0.000314454	0.00539381	0.0582992
Romanian_WHG_M95	Hungarian_BA_BR2	Ballito Bay A	46340	45993	0.00375814	0.00375814	0.00517168	0.726676
Romanian_WHG_M96	Hungarian_EN_NE1	Ballito Bay A	65974	66424	-0.00339884	-0.00339884	0.00473183	-0.718294
Romanian_WHG_M96	Romanian_Eneo_GB	Ballito Bay A	59574	60034	-0.0038459	-0.0038459	0.00513792	-0.748532
Romanian_WHG_M96	Hungarian_BA_BR2	Ballito Bay A	64875	64736	0.00107244	0.00107244	0.00472792	0.226831
Romanian_WHG_OC	Hungarian_EN_NE1	I9028	46517	47387	-0.00926478	-0.00926478	0.00499671	-1.85418
Romanian_WHG_OC	Romanian_Eneo_GB	I9028	43320	43245	0.000866401	0.000866401	0.00546389	0.158568
Romanian_WHG_OC	Hungarian_BA_BR2	I9028	46098	45893	0.00222848	0.00222848	0.00512493	0.434831
Romanian_WHG_M95	Hungarian_EN_NE1	I9028	37185	37948	-0.0101553	-0.0101553	0.00513752	-1.9767
Romanian_WHG_M95	Romanian_Eneo_GB	I9028	34051	34104	-0.000777639	-0.000777639	0.00564697	-0.137709
Romanian_WHG_M95	Hungarian_BA_BR2	I9028	36755	36875	-0.00162977	-0.00162977	0.00539985	-0.301818
Romanian_WHG_M96	Hungarian_EN_NE1	I9028	51524	52597	-0.0103053	-0.0103053	0.00495444	-2.08002
Romanian_WHG_M96	Romanian_Eneo_GB	I9028	47062	47445	-0.00405261	-0.00405261	0.00540569	-0.749693
Romanian_WHG_M96	Hungarian_BA_BR2	I9028	51158	51171	-0.000127041	-0.000127041	0.00517221	-0.0245623
Romanian_WHG_OC	Hungarian_EN_NE1	I9133	47902	48658	-0,007829329	-0,007829329	0,004931259	-1.58769
Romanian_WHG_OC	Romanian_Eneo_GB	I9133	44241	44327	-0,0009710053	-0,0009710053	0,005138888	-0,1889524
Romanian_WHG_OC	Hungarian_BA_BR2	I9133	46913	47649	-0,007783253	-0,007783253	0,004874405	-159676
Romanian_WHG_M95	Hungarian_EN_NE1	I9133	38364	38420	-0,0007293186	-0,0007293186	0,00531939	-0,1371057
Romanian_WHG_M95	Romanian_Eneo_GB	I9133	35083	34574	0,007307234	0,007307234	0,005590515	1.30708
Romanian_WHG_M95	Hungarian_BA_BR2	I9133	37599	37708	-0,001447409	-0,001447409	0,00551818	-0,2622982
Romanian_WHG_M96	Hungarian_EN_NE1	I9133	53218	53247	-0,00027239	-0,00027239	0,004810986	-0,05661833
Romanian_WHG_M96	Romanian_Eneo_GB	I9133	48685	48207	0,004933328	0,004933328	0,005149393	0,9580406
Romanian_WHG_M96	Hungarian_BA_BR2	I9133	52419	52388	0,0002957818	0,0002957818	0,004932169	0,05996992
Romanian_WHG_OC	Hungarian_EN_NE1	Newcastle	66853	67945	-0.00810101	-0.00810101	0.00504261	-1.60651
Romanian_WHG_OC	Romanian_Eneo_GB	Newcastle	62215	61472	0.0060071	0.0060071	0.0051652	1.163
Romanian_WHG_OC	Hungarian_BA_BR2	Newcastle	65843	65698	0.00110232	0.00110232	0.00490121	0.224907
Romanian_WHG_M95	Hungarian_EN_NE1	Newcastle	74198	75516	-0.00880345	-0.00880345	0.0048873	-1.80129
Romanian_WHG_M95	Romanian_Eneo_GB	Newcastle	67998	67927	0.000522347	0.000522347	0.00505918	0.103247
Romanian_WHG_M95	Hungarian_BA_BR2	Newcastle	73094	73551	-0.00311637	-0.00311637	0.00482475	-0.645914
Romanian_WHG_M96	Hungarian_EN_NE1	Newcastle	52665	53794	-0.010605	-0.010605	0.00526636	-2.01373
Romanian_WHG_M96	Romanian_Eneo_GB	Newcastle	48469	48482	-0.000134088	-0.000134088	0.00540231	-0.0248206
Romanian_WHG_M96	Hungarian_BA_BR2	Newcastle	51770	52423	-0.00626722	-0.00626722	0.00498499	-1.25722
Romanian_WHG_OC	Hungarian_EN_NE1	Mfongosi	66765	67279	-0.00383456	-0.00383456	0.00488484	-0.784992
Romanian_WHG_OC	Romanian_Eneo_GB	Mfongosi	61302	61572	-0.00219737	-0.00219737	0.0050013	-0.43936
Romanian_WHG_OC	Hungarian_BA_BR2	Mfongosi	65605	65505	0.000762718	0.000762718	0.00481628	0.158362
Romanian_WHG_M95	Hungarian_EN_NE1	Mfongosi	52964	52624	0.00322006	0.00322006	0.00490827	0.656048
Romanian_WHG_M95	Romanian_Eneo_GB	Mfongosi	48340	47808	0.00553314	0.00553314	0.00533155	1,037,811
Romanian_WHG_M95	Hungarian_BA_BR2	Mfongosi	52071	51581	0.00472736	0.00472736	0.00522324	0.905062
Romanian_WHG_M96	Hungarian_EN_NE1	Mfongosi	74187	74939	-0.00504272	-0.00504272	0.00474535	-1,062,664
Romanian_WHG_M96	Romanian_Eneo_GB	Mfongosi	67150	68051	-0.00666415	-0.00666415	0.00497011	-1,340,846
Romanian_WHG_M96	Hungarian_BA_BR2	Mfongosi	72837	73230	-0.00269055	-0.00269055	0.00487018	-0.552453
Romanian_WHG_OC	Hungarian_EN_NE1	Eland-Cave	67404	67945	-0.00399707	-0.00399707	0.0053025	-0.75381
Romanian_WHG_OC	Romanian_Eneo_GB	Eland-Cave	62183	61651	0.00429607	0.00429607	0.00545183	0.788006
Romanian_WHG_OC	Hungarian_BA_BR2	Eland-Cave	66395	65867	0.00399208	0.00399208	0.00507151	0.787157
Romanian_WHG_M95	Hungarian_EN_NE1	Eland-Cave	53051	53864	-0.00760417	-0.00760417	0.00525183	-1.44791
Romanian_WHG_M95	Romanian_Eneo_GB	Eland-Cave	48645	48570	0.000771486	0.000771486	0.00548672	0.14061
Romanian_WHG_M95	Hungarian_BA_BR2	Eland-Cave	52451	52470	-0.000181089	-0.000181089	0.00542548	-0.0333774
Romanian_WHG_M96	Hungarian_EN_NE1	Eland-Cave	74606	76212	-0.0106486	-0.0106486	0.0049894	-2.13424
Romanian_WHG_M96	Romanian_Eneo_GB	Eland-Cave	67861	68444	-0.00427717	-0.00427717	0.00519681	-0.823038
Romanian_WHG_M96	Hungarian_BA_BR2	Eland-Cave	73570	73987	-0.00282603	-0.00282603	0.00496997	-0.568621
